# Supplementary material
Source: Springer Nature journal article supplement (https://www.springermedizin.de/resource/supplementary/12943_2011_994_MOESM10_ESM.pdf/9552098)

**A**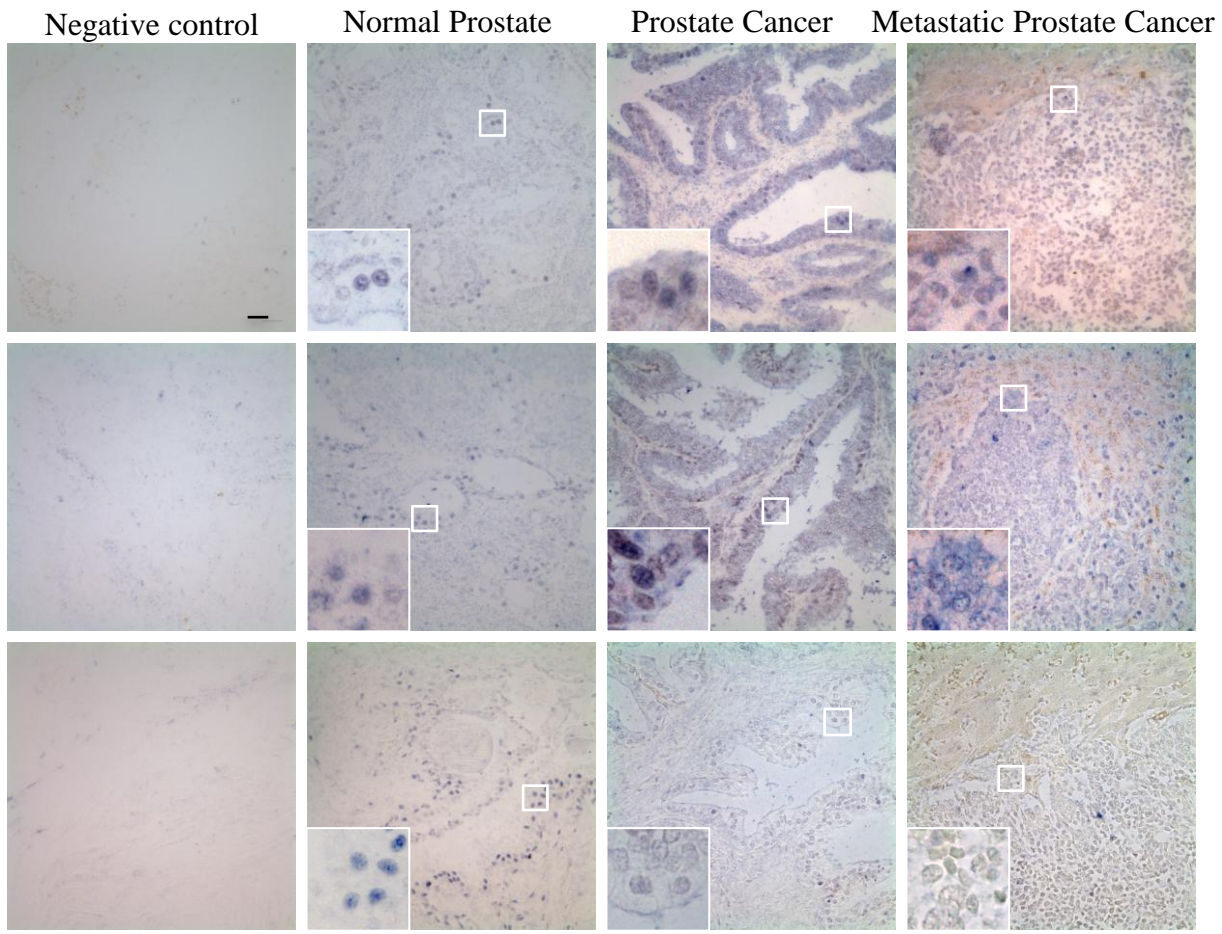**B**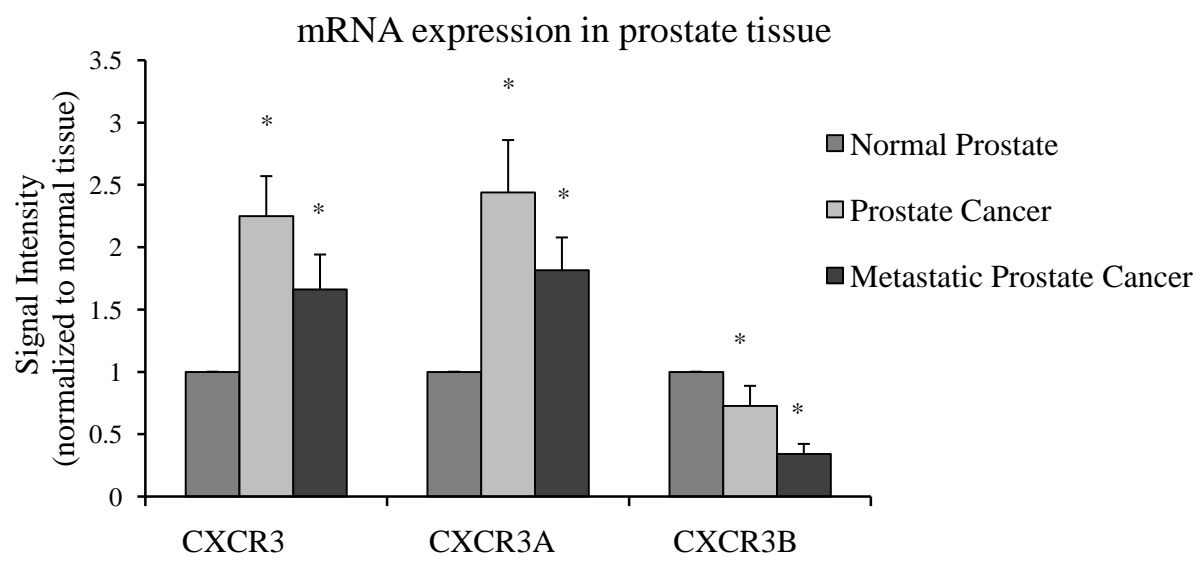

Supplement: MOESM10 [file 9552098]
